# Supplementary material for: War-associated Civilian Vulnerability and its Predictive factors in Tigray Region, Northern Ethiopia: A Zero-Inflated Poisson regression model
Source: Research Square preprint supplement (doi:10.21203/rs.3.rs-7036187/v1), 2025-08-01
Supplement: Supplementary file 1 [file 663e878178530faad423ed0e.docx]

**Annex: Interviewer-Administered Questionnaire**

***Introduction and Consent:***

Hello. My name is _______________________________________. I am working with the joint team from Tigray Regional Health Bureau (TRHB), Mekelle University College of Health Sciences (MUCHS), Tigray Health Research Institute (THRI) and Mums for Mums (MfM). We are now conducting on an integrated survey (**Behavioral *and social drivers (BeSD) COVID-19 vaccination, Obstetric fistula (OF) and Pelvic Organ Prolapse (POP), Integrated Measle Campaign (IMC) and Routine Immunization***). The information we collect will help the regional government to plan on the COVID-19 vaccine uptake and intention, assessing the burden of POP and OF, IMC and routine immunization coverage and factors affecting and to take appropriate measures. You are as [**Women or Men]** are selected for the survey. I know you are busy, so this will take only a few minutes approximately 45 minutes. Your participation is completely voluntary and anonymous. All of the answers you give will be confidential and will not be shared with anyone other than members of our survey team. You don't have to be in the survey, but we hope you will agree to answer the questions since your answers to the question are important. If I ask any question you don't want to answer, just let me know and I will go on to the next question or you can stop the interview at any time. In addition, the data will be collected through an electronic data collection called open data kit (ODK).

Would you be willing to take the survey?

- Yes
- No

IF THE RESPONSE IS “**YES**” TO THE CONSENT SHEET: Thank you very much. Do you have any questions for me before we begin?

PROCEED TO THE SURVEY SCREENER AFTER ADDRESSING ANY QUESTIONS.

IF THE RESPONSE IS “**NO**” TO THE CONSENT SHEET: Thank you very much. END INTERVIEW

**Section 1:- Socio-demographic and economic-related questions**

| **Socio-demographic and economic-related questions** | | | |
| --- | --- | --- | --- |
| **S. N** | **Question** | **Response** | **Skip** |
| 101 | Zone | 1. South 2. **South East** 3. **Mekelle** 4. **Eastern** 5. **Central** 6. **Northwest** |  |
| 102 | Woreda | **South**  1. Raya Azebo  2.Neksege  3.Bora  **South East**   1. Wajirat 2. Seharti   **Mekelle**  1. Hawelti  **East**  1.Wukro  2.Hawzen(Rural)  3.Ganta-afeshum  **Central**  1.Endabatsahma(Edaga-abi)  2.Rama-adi 4  3.Kola-temben  4.Axum (Town)  5.Rural Adwa  6.Adet  **North West**  1.Zana  2.Sheraro(Town)  3.Asgede  4.Laelay Adiabo |  |
| 103 | Tabia name | ------- |  |
| 104 | Kushet name | ------- |  |
| 105 | Personnel | a) Interviewer Name ______  b). Field Supervisor | ________ |
| 106 | Date of visit | [_____|_____| ______|  dd |mm |yyyy |  |
| 107 | Sex | Female--------1  Male-------2 |  |
| 108 | Age of respondent in completed years | …………… (in years) |  |
| 109 | Marital status of the respondent | 1=Single  2= Married  3=Divorce  4=Widowed  5=Separated |  |
| 110 | what was your age at marriage? | ...................... (in years)  NA--------99 |  |
| 111 | What is your educational status? | 1=Unable to read and write  2=Able to read and write but not attend formal education  3=Elementary school  4=Secondary school  5= College and above |  |
| 112 | What is your partner`s educational status? | 1=Unable to read and write  2=Able to read and write but not attend formal education  3=Elementary school  4=Secondary school  5= College and above |  |
| 113 | What is your religion? | 1=Orthodox  2=Protestant  3=Muslim  4= Catholic  99=Others specify………. |  |
| 114 | What is your ethnicity? | 1= Tigraway/ti  2= Erob  3= Afar  4=Amhara  99= Others specify……….. |  |
| 115 | What is your occupation?  [ **For Female/wife**] | 1=House wife  2= Self-employed  3=Merchant  4=Governmental employed  5= Daily laborer  6= Farmer  99=Others specify……. |  |
| 116 | What is partner’soccupation status?  [For Male/husband] | 1= Farmer  2=Self-employed  3=Merchant  4=Governmental employed  5=Daily laborer  99= Others specify………………. |  |
| 117 | Place of residence?  Hint: ***Semi-urban refers to towns of rural woreda*** | 1= Rural  2=Semi urban  3=Urban |  |
| 117.1 | Type of study participants under interview? | 1=Host  2=Internal displaced people |  |
| 118 | Family size? | Total………………in number  Under five……………. number  65 years and above_______ number  Pregnant /lactating women____ |  |
| 119 | Is there any family member who was sick in the last 2 weeks? | 1. Yes 2. No | If no Skip 121 |
| 120 | Which family member was sick in the last 2 weeks? | 1. Me 2. Under five children 3. Pregnant or lactating women 4. Elder people (65 years and above) 5. Other family member |  |
| 121 | Do you have any family members who were disabled since the war erupted | 1. Yes 2. No | If no Skip 123 |
| 122 | How many numbers of family disabled since the war erupted | ___________  Under five: ____  Women: -____  Men: ______ |  |
| 123 | Have you ever lost/dead any family member since the war erupted | 1. Yes 2. No | If no Skip 126 |
| 124 | How many numbers of a family died since the war erupted | ___________  Under five: ____  Maternal mortality (pregnancy and delivery-related mortality)  Other mortality ______ |  |
| 125 | What was the perceived cause of death of your family members?  **Check all that apply** | 1. Gunshot 2. Mass killing 3. Pregnant and labour related 4. Infectious disease 5. Chronic disease 6. Starvation/hunger 7. Other, specify |  |
| 126 | Is there any woman in your household who experienced rape since the war erupted? | 1.Yes  2.No | If no Skip 128 |
| 127 | Does the woman visit a health facility for care? | 1.Yes  2.No |  |
| 128 | How do you perceive your household income /wealth as compared with your neighbors? | Rich----------1  Medium______2  Poor________3 |  |
| 129 | Have you ever been displaced since the war erupted? | 1=Yes  2=No |  |
| 130 | Does the war impact your house? | 1. Yes 2. No | If no Skip 132 |
| 131 | What type of impact did you face in your household since the war erupted?  Check that all apply | 1. Damaged  2. Looted  3. Destroyed |  |
| 132 | How long does it take you to walk (double trip) to the nearest health facility? | Health post ________ in minutes  Health center/hospital ________ in minutes |  |
| 133 | Does the health facility in nearby functional? | **Health post**  1=Yes  2=No  **Health center**  1=Yes  2=No |  |
| 134 | Do you get public transport access to the catchment health center or hospital? | 1=Yes  2=No |  |
| 135 | In the last 24 hours did you ate food? | 1=Yes  2=No | If no Skip 137 |
| 136 | If yes, how many times | ________ |  |
| 137 | How do you perceive your house’s food security | Secured-----1  Moderately secured_____2  In secured-----3 |  |
| 138 | Do you have an electricity supply? | 1=Yes  2=No |  |
| 139 | Do you have a radio in your household? | 1=Yes  2=No |  |
| 140 | Do you listen to the radio? | 1=Always/every day  2=At least once a week  3= Less than once a week  4= Not at all |  |
| 141 | Do you have a television in your household? | 1=Yes  2=No |  |
| 142 | Do you watch television? | 1=Always/every day  2=At least once a week  3= Less than once a week  4= Not at all |  |
| 143 | Do you own a mobile telephone? | 1=Yes  2=No |  |
| 144 | Do you use Internet service | 1. Always/every day 2. At least once a week 3. Less than a week 4. Not at all |  |
| 145 | Do you have a bed net in the household? | 1=Yes  2=No | If no skip to Q152 |
| 146 | Does the bed net ready to use or covered the bed?  ***Observe*** | 1=Yes  2=No |  |
| 147 | Does the bed net use the last night? | 1=Yes  2=No | If no skip to Q149 |
| 148 | Who uses the bed net to sleep last night? | 1=Under 5 Children  2=Pregnant or lactating women  3=Entire family | Skip for any answer to Q150 |
| 149 | What was the reason for not using the bed net? | 1=Lack of awareness  2= Difficult in the procedure to apply  3= Being saved for future use  4= Perception that there is little risk of acquiring malaria  5= Concerns related to chemicals  6= Lack of trust in the prevention of malaria  7=Other, specify |  |
| 150 | Does the houseuse the bednet for other purposes? | 1=Yes  2=No | If no skip to Q201 |
| 151 | What was the reason for using the bed net for other purposes? | 1=Lack of awareness  2= Difficult in the procedure to apply  3= Being saved for future use  4= perception that there is little risk of malaria  5= Perception that does not believe that it prevents malaria  6= Concerns related to chemicals  7=lack of trust  8=Economic problem  9=Other, specify_________ |  |

**Section 2**. **BeSD COVID-19 Vaccination**

| **S. N** | **Question** | **Response** | **Skip** |
| --- | --- | --- | --- |
| Q201 | Do you have a chronic illness?  Hint: DM, HTN, TB, HIV, Cancer, Cardiac and renal disease | 1_____Yes  2______No  3______Not sure | If no Skip 202 |
| Q201.1 | Type of chronic illness | 1=DM  2=HTN  3=HIV/AIDS  4=TB   1. Cardiac disease   6=renal disease  7=Cancer  8=Other, specify________ |  |
| Q202 | Do you have/had a family member with a chronic illness? | 1_____Yes  2______No  3______Not sure | If no Skip 203 |
| Q202.1 | Type of chronic illness | 1=DM  2=HTN  3=HIV/AIDS  4=TB  5.Cardiac disease  6=Renal disease  7=Cancer  8=Other, specify________ |  |
| Q202.2 | Do you any family member who died due to chronic disease | 1= Yes  2=No | If no Skip 203 |
| Q202.3 | Type of chronic illness | 1=DM  2=HTN  3=HIV/AIDS  4=TB  5.Cardiac disease  6=Renal disease  7=Cancer  8=Other, specify________ |  |
| Q203 | To your knowledge, have you been infected with Covid-19? | 1_____Yes  2______No | If no Skip 206 |
| 204 | IF “YES to Q203”, Was it mild or severe? | 1. Mil 2. Severe |  |
| 205 | Was it confirmed by a test? | 1. Confirmed by a test 2. Not confirmed by a test |  |
| 206 | Have your family member/s ever been infected with Covid-19? | 1=Yes  2=No |  |
| 207 | Which your family member was infected by Covid-19 | 1. Under 5 children 2. Pregnant or lactating women 3. Elderly (65 and above years) 4. Person with chronic illness 5. Other family member |  |
| 208 | Have you ever heard about the COVID-19 vaccine? | 1. Yes 2. No | If no, skip to Q211 |
| 209 | From where do you mainly receive information about the COVID-19 vaccine ? | 1. Healthcare facilities 2. Media (TV or Radio) 3. School 4. Social gatherings (market, church, mosque etc) 5. Community leaders 6. Printing materials 7. Social media (Facebook,)   Others, specify___ |  |
| 210 | Which source of information is most trusted to you? | 1. Healthcare facilities 2. Media (TV or Radio) 3. School 4. Social gatherings (market, church, mosque etc) 5. Community leaders 6. Printing materials 7. Social media (Facebook,) 8. Others, specify___ |  |
| 211 | Have you ever heard any information regarding COVID-19 that makes you fear not vaccinating | 1. Yes 2. No |  |
| 212 | From which source you heard that information? | 1. Friends/colleagues/peers 2. Family member 3. Health workers 4. Social media (Facebook) 5. Community/religious leaders 6. Others, specify___ |  |
| 213 | Is Covid-19 a serious disease problem? | 1. Yes 2. No 3. I don’t know |  |
| 214 | Do you think that vaccines effectively prevent acquiring Covid-19? | 1. Yes 2. No 3. I don’t know |  |
| 215 | Do you think that Covid-19 vaccines have side effects? | 1. Yes 2. No 3. I don’t know | If no or I don’t know skip to Q217 |
| 216 | What type of side effects do you know about the Covid-19 vaccine?  Check all that apply | 1. Pain in the arm where I got the shot 2. Redness in the arm where I got the shot 3. Swelling in the arm where I got the shot 4. Tiredness 5. Headache 6. Muscle pain 7. Chills 8. Fever 9. Nausea |  |
| 217 | Is there any group of people special vulnerable to Covid-19 disease | 1. Yes 2. No 3. I don’t know | If no or I don’t know skip to Q219 |
| 218 | Which group of people are specially vulnerable to Covid-19 | 1. Under 5 years old children 2. Elder age (65 and above years) 3. Pregnant or lactating women 4. People with chronic illness |  |
|  |  |  |  |
| 219 | Have you ever received a Covid-19 vaccine? | 1.Yes  2.No | If no or I don’t know skip to Q224 |
| 220 | How many doses of vaccine did you take? | ____  ____ |  |
| 221 | Where do you take the vaccine? | 1. In this region 2. Outside of this region |  |
| 222 | Do you encounter a side effect following taking the vaccine? | 1. Yes 2. No |  |
| 223 | What type of side effects did you develop following taking the Covid-19 vaccine?  **Check all that apply** | 1=Pain in the arm where I got the shot  2=Redness in the arm where I got the shot  3=Pain in the arm where I got the shot  4=Redness in the arm where I got the shot  5=Swelling in the arm where I got the shot  6=Tiredness  7=Headache  8=Muscle pain  9=Chills  10=Fever  11=Nausea  Other, specify |  |
| 224 | Do you family members vaccinate for Covid-19 vaccine?  Hint: ONLY for Adults | 1. Yes 2. No 3. Not sure | If NO or Not Sure, skip to Q226 |
| 225 | Do you have family members with chronic illness vaccinated for Covid-19 vaccine? | 1. Yes 2. No 3. Not sure |  |
| 226 | Do you know where to go to get yourself vaccinated? | 1. Yes 2. No 3. Not sure |  |
| 227 | How easy is it to get vaccination services for yourself? Would you say… | 1. Not at all easy 2. A little easy 3. Moderately easy 4. Very easy |  |
| 228 | What makes it hard for you to get vaccines?  **Check all that apply**. | 1. Nothing. It’s not hard 2. I can’t go on my own (I have a physical limitation) 3. It’s too far away 4. The opening times are inconvenient 5. Sometimes people are turned away without vaccination 6. The waiting time is too long 7. Vaccination costs too much 8. Something else, please specify: ________ |  |
| 229 | How concerned are you about getting Covid-19? | 1. Not at all concerned 2. A little concerned 3. Moderately concerned 4. Very concerned | If Not all concerned, skip to 232 |
| 230 | What makes you concerned more to be infected with Covid-19? | 1. My daily activities expose me to many people 2. I am ahigh risky group 3. Not using a protection measure 4. Many people are infected with Covid-19 like symptoms 5. Other, specify |  |
| 231 | How serious the consequence of Covid-19 would be for you | 1. Not at all 2. A little 3. Moderately 4. Very much |  |
| 232 | How much would you trust the new Covid-19 vaccine if it were available for you now? | 1. Not at all 2. A little 3. Moderately 4. Very much |  |
| 233 | How important do you think getting a Covid-19 vaccine will be for your health? Would you say… | 1. Not at all important 2. A little important 3. Moderately important 4. Very important |  |
| 234 | How much do you think getting a COVID-19 vaccine prevents you from acquiring the disease? | 1. Not at all 2. A little 3. Moderately 4. Very much |  |
| 235 | How much do you think getting a Covid-19 vaccine for yourself will protect other family members/community from Covid-19? | 1. Not at all 2. A little 3. Moderately 4. Very much |  |
| 236 | How safe do you think a Covid-19 vaccine will be for you? Would you say… | 1. Not at all safe 2. A little safe 3. Moderately safe 4. Very safe |  |
| 237 | How concerned are you that a Covid-19 vaccine could cause you to have a serious reaction? Would you say… | 1. Not at all concerned 2. A little concerned 3. Moderately concerned 4. Very concerned |  |
| 238 | Do you concern that possible opposition from others could influence your decision get vaccine on COVID-19? | 1. Not at all concerned 2. A little concerned 3. Moderately concerned 4. Very concerned |  |
| 239 | If a Covid-19 vaccine were recommended for you, would you get it? | 1. Yes, definitely 2. Probably, Yes 3. Not sure 4. Probably, NO 5. Not at all |  |
| 240 | How much do you want to get a Covid-19 vaccine? Would you say… | 1. Not at all 2. A little 3. Moderately 4. Very much |  |
| 241 | Will you take the COVID-19 vaccine when it becomes available? | 1. Yes, definitely 2. Probably, Yes 3. Not sure 4. Probably, NO 5. Not at all | If the response is 1 or 2, skip to 243 |
| 242 | What was the reason for not taking the vaccine when it became available? | 1. Fear of side effects 2. It causes infertility 3. It is a biological weapon 4. Doubt about vaccine 5. I have no enough information 6. Vaccine cause COVID-19 7. Vaccine is ineffective 8. Other, specify |  |
| 243 | Would you recommend a Covid-19 vaccine to other people including your family? | 1. Yes 2. No 3. Not sure |  |
| 244 | Where would you prefer to get a Covid-19 vaccine? | 1. Health facility 2. Health centre/clinic 3. Workplace 4. Pharmacy 5. Community centre, meeting hall, or local shop 6. Somewhere else, please specify: ________ 7. I don’t want the vaccine |  |
| 245 | In your family, who will have the final say/decision about whether you get a Covid-19 vaccine? | 1. Me 2. My spouse/partner 3. My parents or in-laws 4. My children 5. Someone else, please specify: |  |
| 246 | If it was time for you to get a Covid-19 vaccine, would you need permission to go and get it? | 1. Yes 2. No |  |
| 247 | Do you think most of your close family and friends would want you to get a Covid-19 vaccine? | 1. Yes 2. No 3. Not sure |  |
| 248 | Do you think your community leaders or religious leaders would want you to get a Covid-19 vaccine? | 1. Yes 2. No 3. Not sure |  |
| 249 | Do you think most adults you know will get a Covid-19 vaccine, if it is recommended to them? | 1. Yes 2. No 3. Not sure |  |
| 250 | Do you think that getting a Covid-19 vaccine will allow you to safely see your family and friends again? | 1. Yes 2. No 3. Not sure |  |
| 251 | How much do you trust the [health care providers] who would give you a Covid-19 vaccine? Would you say you trust them… | 1. Not at all 2. A little 3. Moderately 4. Very much |  |
| 252 | Have you seen or heard anything bad about Covid-19 vaccines? | 1. Yes 2. No |  |
| 253 | What type of misinformation/myths/misconception about the Covid-19 vaccine you heard? | 1. It is not effective 2. It causes Covid-19 disease 3. It results infertility 4. It causes Covid-19 5. Other, specify |  |
| 254 | If the respondent is male, END asking the question |  |  |

## Visual response scale

The following visual response scale may also be useful in certain settings to facilitate understanding of the 4-point response options.

**Section 3: Reproductive health and maternal health service utilization related questions**

| **Reproductive health and maternal health service utilization related questions** | | | |
| --- | --- | --- | --- |
| **S. N** | **Question** | **Response** | **Skip** |
| 301 | How many of pregnancies have you conceive up to date? | ………(in number) |  |
| 302 | How many of births have you gave up to date? | ………(in number) |  |
| 303 | How many live births do you have up to now? |  |  |
| 304 | How many still births do you have up to now? you ever had a stillbirth? | __ |  |
| 305 | How many abortions did face in your life time? | ______ |  |
| 306 | Have you ever had used contraceptive method?  Hint: Ask for current use also? | 1=Yes  2=No | If no skip to Q311 |
| 307 | Are you currently using any contraceptive method? | 1=Yes  2=No  3=NA (aged women 50 and above) | If NA skip to Q312 |
| 308 | If yes Q307, what types of contraceptive method do you use? | 1=Female sterilization  2=IUD  3= Injectable  4=Implants  5= Pill  6=Female condom  7=Emergency contraception  8= Standard days method  9=Lactational amenorrhea method  99= Others specify………………. |  |
| 309 | If yes Q 307, where did you obtain (current method of contraceptive) the last time? | 1= Government hospitals  2=Government health center  3=Government health post  4= Private clinic/hospital  5= Private pharmacy  6=NGO health facility  99= Others specify………………. |  |
| 310 | During the war, have you ever switched using any contraceptives while you want to use? | 1=Yes, I switched  2=No |  |
| 310.1 | During the war, have you ever discontinued using contraceptives while you want to use? | 1=Yes, I discontinued  2=No  3= NA (discontinued voluntary) |  |
| 311 | Have you ever got pregnant (**current/last**) since the war erupted? | 1=Yes  2=No | If No skip to Q 401 |
| 311.1 | At the time you became pregnant did you want to become pregnant then, did you want to wait until later, OR did you NOT WANT to have any more children? | Then………….1  Later………….2  Not want more children………….3 |  |
| 312 | Are you currently pregnant | 1=Yes  2=No | If No skip to Q314 |
| 313 | Gestational age of the current pregnancy | ____ weeks |  |
| 314 | Have you had ANC follow-ups, for your pregnancy(**current/last**) since the war erupted? | 1=Yes  2=No | If No skip to Q318 |
| 315 | If yes Q 314, how many times did you receive antenatal care for your pregnancy(**current/last**) since the war erupted? | Number of times------------ |  |
| 316 | If yes Q 314, how many weeks pregnant were you when you first received antenatal care for your pregnancy(**current/last**) since the war erupted? | -----------week  98= Don't know |  |
| 317 | If yes Q 314, have you ever postponed/ interrupted your ANC visit due to the war? | 1=Yes  2=No | If No skip to Q319 |
| 318 | What was your reason for postpone/interruption or not using ANC follow-up? | 1=Health facility closed  2=No health worker at the facility  3=No supply and medicine for ANC  4=Security reason  5=Displacement  6= No public transport  7=Other, Specify___ |  |
| 319 | Where was the place of delivery for last child, since the war erupted ? (**last child**) | 1= At home  2=Government hospitals  3=Government health center  4=Government health post  5= Private clinic/hospital  6=NGO health facility  99= Others specify………………. |  |
| 320 | What was the main reason for having home delivery? | 1= Security issue due to the war  2= Health facility closed  3=No health worker at the facility  4=no supply and medicine for labor and delivery  5= Husband/family disapproval  6=Displacement  7= No ambulance service  8 =Others specify………….. |  |
| 321 | Did you have PNC visit for your last childsince the war erupted? | 1=Yes  2=No | If No skip to Q 324 |
| 322 | If yes Q 321, how many visits did you have? **(last child)** | Numbers of visits---------- |  |
| 323 | If yes Q 321, where did you get PNC service? **(last child)** | 1= At home  2=Government hospitals  3=Government health center  4=Government health post  5= Private clinic/hospital  6=NGO health facility  99= Others specify………………. |  |
| 324 | If no Q 321, what was the main reason for not had PNC during your post-partum period? | 1= Security issue due to the war  2= Health facility closed  3=No health worker at the facility  4=No supply and medicine  5= Husband/family disapproval  6=Displacement  7= No ambulance service  8 =Others specify………….. |  |

**Section 4:-Seeking care and treatment for obstetric fistula**

| Seeking care and treatment for obstetric fistula related questions | | | |
| --- | --- | --- | --- |
| **S. N** | **Question** | **Response** | **Skip** |
| 401 | Have you ever experienced a constant (a continuous) leakage of urine and/or stool from your vagina during the day and night? | 1=Yes  2=No | If No skip to Q 501 |
| 402 | When was the problem happen to you for the first time? | 1= Before the war  2=During the war  3=After the war |  |
| 403 | What year did this problem occur to you for the first time? | _Year |  |
| 404 | Did this problem occur after a delivery? | 1=Yes  2=No | If Yes skip to Q 408 |
| 405 | Did  this  problem occur  after  an  operation  in  your pelvic  area?  (pelvic  surgery) | 1=Yes  2=No |  |
| 406 | Did this problem  occur  after  sexual assault? | 1=Yes  2=No |  |
| 407 | Did this problem occur  after  other event? | 1=Yes  2=No |  |
| 408 | Did  this  problem  occur  after  a  normal  labor  and delivery,  or  after  a  very  difficult  labor  and  delivery? | 1=Normal Labor/Delivery  2=Very difficult/prolonged  Delivery |  |
| 409 | Where did the delivery  take  place? | 1= At home  2=Health facility | If Home skip to Q 412 |
| 410 | How long after  the  labor  pains  began  did  you  go  to the  facility? | 1=<12  hours  2=12-­24  hours  3=>24  hours  4=_I  don’t  know |  |
| 411 | Did you  get  a  cesarean  section  at  the  facility? | 1=Yes  2=No |  |
| 412 | Was this  baby  born  alive? | 1=Yes  2=No |  |
| 414 | After which delivery  did  this  occur? | ____ delivery number |  |
| 415 | How  many  days  after the cause of the problem from [Q404-407]  did  the  leakage  start? | ____ Number of  days |  |
| 416 | Have you sought treatment for  this  condition? | 1=Yes  2=No | If No skip to Q 418 |
| 417 | From where  did  you  last  seek  treatment? | 1=Health facility  2=Religion/tradition  3= Other (specify)----------- |  |
| 418 | Did the treatment stop  the  problem? | 1=YES, No more leakage at  all  2=YES, But  still  some  leakage  3=No, Still have problem | If the response is neither 1, 2 or 3skip to Q420 |
| 419 | Why  have  you  not  sought  treatment?  (Multiple options available) | 1=Do not know can be fixed  2= Do not know where to go  3=Too expensive  4= Too far  5= Security issue due to the war  6= Health facility closed  7=No health worker at the facility  8=Poor quality of care  9= Could not get permission 10=Embarrassment  11=Problem disappeared  12= Other (specify)-------- |  |
| 420 | Are there any (other) women in your householdwho suffer fromvesicovaginal  fistula/obstetric fistula? | 1=Yes  2=No | If No skip to Q 423 |
| 421 | How many (other) women in your household  suffer from  vesicovaginal  fistula/obstetric  fistula? | __ number  Do not know_____99 |  |
| 422 | Did she/they come or  are  they  planning  to  come  to the  screening? | 1=Yes  2=No  3=I don’t know |  |
| 423 | Were you supported by your husband/partner while you experienced a constant leakage of urine or stool from your vagina? | 1=Yes  2=No |  |

**Section 5:- Knowledge of women’s on Obstetric fistula**

| **S. N** | **Question** | **Response** | **Skip** |
| --- | --- | --- | --- |
| 501 | Have you ever heard of obstetric fistula? | 1=Yes  2=No |  |
| 502 | Do you know the type of fistula? | 1=Yes  2=No | If No skip to Q 504 |
| 503 | If yes Q502, what are the type of obstetric fistula?  **(More than one answer is possible)** | 1=Recto-Vaginal Fistula (RVF)  2=Vesico-Vaginal Fistula (VVF) |  |
| 504 | Do you know the sign/ symptoms of obstetric fistula? | 1=Yes  2=No | If No skip to Q 506 |
| 505 | If yes Q504, what sign/symptoms of obstetric fistula do you know?  **(Multiple answer are possible)** | 1= Urinary incontinency  2= Faecal incontinency  3= Vulvar irritation  4= Foul-smelling vaginal discharge  5= Leakage of gas/faces into the vagina  6= Pain while having sex  99= Others (Specify)………… |  |
| 506 | Do you know the causes/ risk factors of obstetric fistula? | 1=Yes  2=No | If No skip to Q 508 |
| 507 | If yes to Q 506, what are the causes/risk factors of obstetric fistula | 1=Prolonged /obstructed labour  2= Sexual violence  3=Accidental injuries during surgeries or episiotomy  4=Early marriage  5=Home delivery  6=Un spaced childbirth  7=Delay in decision to seek care, reaching care and receiving care  8= Childhood malnutrition  99= Others (Specify)………… |  |
| 508 | Is obstetric fistula preventable? | 1=Yes  2=No | If No skip to Q 510 |
| 509 | If yes Q508, what are the prevention methods of obstetric fistula? | 1= Avoid teenage pregnancy  2= Cessation of harmful traditional practices  3=Timely visit/seeking of skilled obstetric care  4=Avoiding poverty  5=Empowering women and female education  6=Skilled care at birth  7= Family planning use  99= Other (specify)------------ |  |
| 510 | Is obstetric fistula a treatable? | 1=Yes  2=No |  |

Section 6: -**POPrelated question**

**Section 6.1: Pelvic Floor Questionnaire (PFDI)**

| Instructions: | | | | | | | | | | | | | | | | | |
| --- | --- | --- | --- | --- | --- | --- | --- | --- | --- | --- | --- | --- | --- | --- | --- | --- | --- |
| Please answer the following questions by placing an “X” in the appropriate box. If you are unsure about how to answer a question, give the best answer you can. While answering these questions, please consider your symptoms over the last three months. Thank you for your help. | | | | | | | | | | | | | | | | | |
| 601 | Do you usually experience pressure in the lower abdomen? | | No | Yes |  | | Not at all | Somewhat | | | Moderately | | | Quite a bit | | | |
| 0 |  | If yes, how much does this bother you? | | 1 | 2 | | | 3 | | | 4 | | | |
|  | | | No | Yes |  | | Not at all | Somewhat | | | Moderately | | | Quite a bit | | | |
| 602 | Do you usually experience heaviness or dullness in the pelvic area? | | 0 |  | If yes, how much does this bother you? | | 1 | 2 | | | | 3 | | | 4 | | |
|  |  |  | No | Yes |  |  | Not at all | | Somewhat | | | Moderately | | | | Quite a bit | |
| 603 | Do you usually have a bulge or something falling out that you can see or feel in the vaginal area? | | 0 |  | If yes, how much does this bother you? | | 1 | | 2 | | | 3 | | | | 4 | |
|  |  | | No | Yes |  | |  | | Not at all | | | Somewhat | | | | Moderately | |
| 604 | Do you ever felt an ulcer on the bulge | | 0 |  | If yes, how much does this bother you? | | 1 | | 2 | | | 3 | | | | 4 | |
|  | | | No | Yes |  | | Not at all | | | Somewhat | | | Moderately | | | | Quite a bit |
| 605 | Do you usually have to push on the vagina or around the rectum to have or complete bowel movement? | | 0 |  | If yes, how much does this bother you? | | 1 | | 2 | | | 3 | | | | 4 | |
|  |  |  | No | Yes |  | | Not at all | | Somewhat | | | Moderately | | | | Quite a bit | |
| 606 | Do you usually experience a feeling of incomplete bladder emptying? | | 0 |  | If yes, how much does this bother you? | | 1 | | 2 | | | 3 | | | | 4 | |
|  |  |  | No | Yes |  |  | Not at all | | Somewhat | | | Moderately | | | | Quite a bit | |
| 607 | Do you ever have to push up on a bulge in the vaginal area with your fingers to start or complete urination? | | 0 |  | If yes, how much does this bother you? | | 1 | | 2 | | | 3 | | | | 4 | |
|  |  | | No | Yes |  |  | Not at all | | Somewhat | | | Moderately | | | | Quite a bit | |
| 608 | Do you feel you need to strain too hard to have a bowel movement? | | 0 |  | If other than never, how much does this bother you? | | 1 | | 2 | | | 3 | | | | 4 | |
|  | | | No | Yes |  | | Not at all | | | Somewhat | | | Moderately | | | | Quite a bit |
| 609 | Do you feel you have not completely emptied your bowels at the end of a bowel movement? | | 0 |  | If other than never, how much does this bother you? | | 1 | | 2 | | | 3 | | | | 4 | |
|  |  |  | No | Yes |  | | Not at all | | Somewhat | | | Moderately | | | | Quite a bit | |
| 610 | Do you usually lose stool beyond your control if your stool is well formed? | | 0 |  | If yes, how much does this bother you? | | 1 | | 2 | | | 3 | | | | 4 | |
|  | | | No | Yes |  | | Not at all | | | Somewhat | | | Moderately | | | | Quite a bit |
| 611 | Do you usually lose stool beyond your control if your stool is loose or liquid? | | 0 |  | If yes, how much does this bother you? | | 1 | | 2 | | | 3 | | | | 4 | |
|  | | | No | Yes |  | | Not at all | | | Somewhat | | | Moderately | | | | Quite a bit |
| 612 | Do you usually lose gas from the rectum beyond your control? | | 0 |  | If yes, how much does this bother you? | | 1 | | 2 | | | 3 | | | | 4 | |
|  | | | No | Yes |  | | Not at all | | | Somewhat | | | Moderately | | | | Quite a bit |
| 613 | Do you usually have pain when you pass your stool? | | 0 |  | If yes, how much does this bother you? | | 1 | | 2 | | | 3 | | | | 4 | |
|  | | | No | Yes |  | | Not at all | | | Somewhat | | | Moderately | | | | Quite a bit |
| 614 | Do you experience a strong sense of urgency and have to rush to the bathroom to have a bowel movement? | | 0 |  | If other than never, how much does this bother you? | | 1 | | | 2 | | 3 | | | | 4 | |
|  | | | No | Yes |  | | Not at all | | | Somewhat | | | Moderately | | | | Quite a bit |
| 615 | Does a part of your bowel every pass through the rectum and bulge outside during or after a bowel movement? | | 0 |  | If yes, how much does this bother you? | | 1 | | 2 | | | 3 | | | | 4 | |
|  |  |  | No | Yes |  | | Not at all | | Somewhat | | | Moderately | | | | Quite a bit | |
| 616 | Do you usually experience frequent urination? | | 0 |  | If yes, how much does this bother you? | | 1 | | 2 | | | 3 | | | | 4 | |
|  | | | No | Yes |  | | Not at all | | | Somewhat | | | Moderately | | | | Quite a bit |
| 617 | Do you usually experience urine leakage associated with a feeling of urgency that is a strong sensation of needing to go to the bathroom? | | 0 |  | If yes, how much does this bother you? | | 1 | | 2 | | | 3 | | | | 4 | |
|  | | | No | Yes |  | | Not at all | | | Somewhat | | | Moderately | | | | Quite a bit |
| 618 | Do you usually experience urine leakage related to coughing, sneezing, or laughing? | | 0 |  | If yes, how much does this bother you? | | 1 | | 2 | | | 3 | | | | 4 | |
|  | | | No | Yes |  | | Not at all | | | Somewhat | | | Moderately | | | | Quite a bit |
| 619 | Do you usually experience small amounts of urine leakage (that is, drops)? | | 0 |  | If yes, how much does this bother you? | | 1 | | 2 | | | 3 | | | | 4 | |
|  | | | No | Yes |  | | Not at all | | | Somewhat | | | Moderately | | | | Quite a bit |
| 620 | Do you usually experience difficulty emptying your bladder? | | 0 |  | If yes, how much does this bother you? | | 1 | | 2 | | | 3 | | | | 4 | |
|  |  | | No | Yes |  | | Not at all | | Somewhat | | | Moderately | | | | Quite a bit | |
| 621 | Do you usually experience pain or discomfort in the lower abdomen or genital region? | | 0 |  | If yes, how much does this bother you? | | 1 | | 2 | | | 3 | | | | 4 | |
| 622 | Please mark the number that best describes how your pelvic floor condition is now: | | 1=Normal  2=Mild  3=Moderate  4=Sever | |  | |  | |  | | |  | | | |  | |

Section 6.2. **Pelvic Floor Impact Questionnaire (PFDI)**

**Some women find that bladder, bowel, or vaginal symptoms affect their activities, relationships and feelings. The next set of questions has to do with areas in your life that may have been affected by your bladder, bowel or vaginal symptoms. Please tell me the one answer that best describes you and your situation.**

|  | **Not at all** | **Somewhat** | **Moderately** | **Quite a bit** | |
| --- | --- | --- | --- | --- | --- |
|  |  |  |  |  | |
| 1a. How do your bladder or urine symptoms usually affect your ability to do household chores (cooking, housecleaning, laundry)? | 1 | 2 | 3 | 4 | |
|  |  |  |  |  | |
| 1b. How do your bowel or rectum symptoms usually affect your ability to do household chores (cooking, housecleaning, laundry)? | 1 | 2 | 3 | 4 | |
|  |  |  |  |  | |
| 1c. How do your pelvic or vaginal symptoms usually affect your ability to do household chores (cooking, housecleaning, laundry)? | 1 | 2 | 3 | 4 | |
| 2a. How do your bladder or urine symptoms usually affect your ability to do physical activities such as walking, swimming or other exercise? | 1 | 2 | 3 | 4 | |
|  |  |  |  |  | |
| 2b. How do your bowel or rectum symptoms usually affect your ability to do physical activities such as walking, swimming or other exercise? | 1 | 2 | 3 | 4 | |
|  |  |  |  |  | |
| 2c. How do your pelvic or vaginal symptoms usually affect your ability to do physical activities such as walking, swimming or other exercise? | 1 | 2 | 3 | 4 | |
| 3a. How do your bladder or urine symptoms usually affect your entertainment activities such as going to a movie or concert? | 1 | 2 | 3 | 4 | |
|  |  |  |  |  | |
| 3b. How do your bowel or rectum symptoms usually affect your entertainment activities such as going to a movie or concert? | 1 | 2 | 3 | 4 | |
|  |  |  |  |  | |
| 3c. How do your pelvic or vaginal symptoms usually affect your entertainment activities such as going to a movie or concert? | 1 | 2 | 3 | 4 | |
| 4a. How do your bladder or urine symptoms usually affect your ability to travel by car or bus for a distance greater than 20 minutes away from home? | 1 | 2 | 3 | 4 |
|  |  |  |  |  |
| 4b. How do your bowel or rectum symptoms usually affect your ability to travel by car or bus for a distance greater than 20 minutes away from home? | 1 | 2 | 3 | 4 |
|  |  |  |  |  |
| 4c. How do your pelvic or vaginal symptoms usually affect your ability to travel by car or bus for a distance greater than 20 minutes away from home? | 1 | 2 | 3 | 4 |
| 5a. How do your bladder or urine symptoms usually affect your participating in social activities outside your home? | 1 | 2 | 3 | 4 |
| 5b. How do your bowel or rectum symptoms usually affect your participating in social activities outside your home? | 1 | 2 | 3 | 4 |
| 5c. How do your pelvic or vaginal symptoms usually affect your participating in social activities outside your home? | 1 | 2 | 3 | 4 |
| 6a. How do your bladder or urine symptoms usually affect your emotional health? | 1 | 2 | 3 | 4 |
| 6b. How do your bowel or rectum symptoms usually affect your emotional health? | 1 | 2 | 3 | 4 |
| 6c. How do your pelvic or vaginal symptoms usually affect your emotional health? | 1 | 2 | 3 | 4 |
| 7a. Do your bladder or urine symptoms cause you to experience feelings of frustration? | 1 | 2 | 3 | 4 |
| 7b. Do your bowel or rectum symptoms cause you to experience feelings of frustration? | 1 | 2 | 3 | 4 |
| 7c. Do your pelvic or vaginal symptoms cause you to experience feelings of frustration? | 1 | 2 | 3 | 4 |

**Section 7: -Integrated measles campaign and routine immunization**

| **Integratedmeasles campaign implementation related questions** | | | | | | |  |
| --- | --- | --- | --- | --- | --- | --- | --- |
| **S. N** | **Question** | | **Response** | | | | **Skip** |
| 701 | Had you heard of the integrated measles campaign implementation?  Hint: -integrated measles campaign implementation was conducted from 18-07-2015-29-07-2015 | | 1=Yes  2=No  3= I did not remember | | | | If No skip to Q 704 |
| 702 | If yes to Q701, when did you heard about the integrated measles campaign? | | 1=a week before the campaign  2=1-5 days before the campaign  3= Just at the day of the campaign  99= Others specify………………. | | | |  |
| 703 | If yes to Q701, from where did you hear the integrated measles campaign implementation information? | | 1=Media television  2=Media radio  3=Health Extension Worker  4=In community gatherings  5=From health facilities  6=Written materials distributed in around us (leaflets, brochures, poster and banner in the place where I live  7=Home visits by health workers from health facilities  8=Community/representatives leaders  9= Religious leaders  99= Others specify………………. | | | |  |
| 704 | Were you Pregnant or Lactating Women during integrated measles campaign in the visited household? | | 1=Yes  2=No | | | | If no, skip to 709 |
| 705 | Did you receive COVID- 19 vaccination during the integrated measles campaign? | | 1= Yes  2= No  3= I was already vaccinated  4= I do not know  99= Others specify………………. | | | |  |
| 706 | Did the **PLW** screening for malnutrition during the campaign? | | 1= Yes  2 = No | | | | If no, skip to 709 |
| 707 | Nutritional status of the **PLW during the campaign?** | | 1= Normal  2 =MAM  3= SAM | | | |
| 708 | Is mother linked to treatment service for PLW with malnutrition? | | 1=Yes  2=No  3= NA | | | |  |
| 709 | Number of children between 0-59 months during the integrated measles campaign in the visited household?  Hint:- If the child age >= 24 months DONOT ASK Q712 to Q730 | | ---------- | | | |  |
| 710 | Did the child receive eligible services integrated measles campaign? **ask for each child by name** | **Child-1** | **Child-2** | **Child-3** | **Child-4** | **Child-5** |  |
| 710.1 | Age of child (in complete months) from the youngest to oldest |  |  |  |  |  |
| 710.2 | Sex of child (1= Female , 2= Male ) |  |  |  |  |  |
| 710.3 | Is there a vaccination card against theintegrated measles campaign (1=Card seen**,** 2=Card existing, not seen**,** 3=No card, 4=NA) |  |  |  |  |  |
| 710.4 | Is the child (6-59 months) (Name) vaccinated for measles vaccine during thecampaign? 1= Yes, with card seen 2= Yes, without card seen 3=No  4=NA |  |  |  |  |  |
| 710.5 | For a child > 24 months of age, does the child fully immunized  (1=Yes, 2=No) |  |  |  |  | **If no skip to 710.8** |
| 710.6 | For a child > 24 months of age, at what age was the child completes his/her immunization? (at……..months) |  |  |  |  | **Once you complete this answer skip to 711.8** |
| 710.7 | What was the main reason for not completed his/her vaccination  1=lack of vaccine  2=Health facility was closed  3=Security issue  4=lack of health workers  5=fear of side effect  6= Child was sick  7= Child was displaced  8= Vaccination post too far  9=Other, specify |  |  |  |  |  |
| 711.8 | Was the child(0-23 months) received catch-up routine immunization during the campaign? (1=Yes, 2=No, 3=NA) |  |  |  |  |  |
| 711.9 | Is the child (24-59 months) received deworming supplementation during the campaign? (1=Yes, 2=No, 3=NA) |  |  |  |  |  |
| 711.10 | Did the child (6-59 months) received VAS during the campaign? (1=Yes, 2=No, 3=NA) |  |  |  |  |  |
| 711.11 | Did the child (6-59 months) screened for malnutrition during the campaign? (1=Yes, 2=No, 3=NA) |  |  |  |  |  |
| 711.12 | Nutritional status of the screened child? (1=Normal, 2=MAM, 3=SAM) |  |  |  |  |  |
| 711.13 | Did the child linked to treatment services for acute malnutrition? (1=Yes, 2=No, 3=NA)  Hint: Applicable for child with MAM or SAM |  |  |  |  |  |
| 711.14 | Was caregiver informed about next appointment for routine immunization?  1=Yes  2=No  3=NA |  |  |  |  |  |
| 711.15 | Was caregiver informed about next appointment for nutritional screening?  1=Yes  2=No  3=NA |  |  |  |  |  |
| 711.16 | Did the caregivers informed about AEFI during immunization?  1=Yes  2=No |  |  |  |  |  |
| 711.17 | Were vaccinated child/children experienced any AEFI?  1=Yes  2=No |  |  |  |  | **If no Skip to Q712** |
| 711.8 | If yes to Q711.17, which types of AEFI?  1=Fever  2= Diarrhea  3= Injection site abscess  4=Shock/faint  5=Rash  6=Swelling  7= vomiting and nausea  99= Others specify………………. |  |  |  |  |  |
| 711.9 | If yes to Q711.17, is caregivers reported the AEFI to the nearby health facility?  1=yes  2=no |  |  |  |  |  |
| **Routine immunization service uptake among children of 0-23 months of age** | | | | | | |
| 712 | Is there a routine immunization card (1=Card seen**,** 2=Card existing, not seen**,** 3=No card) |  |  |  |  |  |
| 713 | Does the child (only for those 0-23 months) started routine immunization? (1=Yes 2=No) |  |  |  |  |  |
| 714 | When was routine immunization started? (At….wks of age) |  |  |  |  |  |
| 715 | Is child (**0-23 months**) Vaccinated for BCG vaccine?  1= Yes, with card seen 2= Yes, without card seen 3=No |  |  |  |  |  |
| 716 | Is child **(0-23 months)** vaccinated for **OPV1** vaccine?  1= Yes, with card seen2= Yes, without card seen3=No  4=NA |  |  |  |  |  |  |
| 717 | Is child **(0-23 months)** vaccinated for **PCV 1** vaccine?  1= Yes, with card seen2= Yes, without card seen3=No  4=NA |  |  |  |  |  |
| 718 | Is child **(0-23 months)** vaccinated for **Pentavalent1** vaccine?  1= Yes, with card seen2= Yes, without card seen3=No  4=NA |  |  |  |  |  |  |
| 719 | Is child **(0-23 months)** vaccinated for **Rota1** vaccine?  1= Yes, with card seen2= Yes, without card seen3=No  4=NA |  |  |  |  |  |  |
| 720 | Is child **(0-23 months)** vaccinated for **OPV2** vaccine?  1= Yes, with card seen2= Yes, without card seen3=No  4=NA |  |  |  |  |  |
| 721 | Is child **(0-23 months)** vaccinated for **PCV2** vaccine?  1= Yes, with card seen2= Yes, without card seen3=No  4=NA |  |  |  |  |  |
| 722 | Is child **(0-23 months)** vaccinated for **Pentavalent2** vaccine?  1= Yes, with card seen2= Yes, without card seen3=No  4=NA |  |  |  |  |  |
| 723 | Is child **(0-23 months)** vaccinated for **Rota2** vaccine?  1= Yes, with card seen2= Yes, without card seen3=No  4=NA |  |  |  |  |  |
| 724 | Is child **(0-23 months)** vaccinated for **IPV v**accine?  1= Yes, with card seen2= Yes, without card seen3=No  4=NA |  |  |  |  |  |
| 725 | Is child **(0-23 months)** vaccinated for **OPV3** vaccine?  1= Yes, with card seen2= Yes, without card seen3=No  4=NA |  |  |  |  |  |
| 726 | Is child **(0-23 months)** vaccinated for **PCV3** vaccine?  1= Yes, with card seen2= Yes, without card seen3=No  4=NA |  |  |  |  |  |
| 727 | Is child **(0-23 months)** vaccinated for **Pentavalent3** vaccine?  1= Yes, with card seen2= Yes, without card seen3=No  4=NA |  |  |  |  |  |
| 728 | Is child **(0-23 months)** vaccinated for **Measles-1** vaccine?  1= Yes, with card seen2= Yes, without card seen3=No  4=NA |  |  |  |  |  |
| 729 | Is child **(0-23 months)** vaccinated for **Measles-2** vaccine?  1= Yes, with card seen2= Yes, without card seen3=No  4=NA |  |  |  |  |  |
| 730 | What was the main reason for not vaccinated/ defaulting the vaccination  1=Lack of vaccine  2=Vaccine vial is not opening for a single child  3= Mother forget vaccination schedule  4=Vaccination time is inconvenient for me(too busy, social issue)  5= Not knowing to back for the next vaccination  6=Mother become sick  7=Health facility was closed  8=Security issue  9=lack of health workers  10=fear of side effect  11= Child was sick  12= Child was displaced  13= Vaccination post too far  14=Other, specify |  |  |  |  |  |  |
| NB: DONOT FORGET TO TAKE GPS | | | | | | | |

**Thank you!**
